# Supplementary figures and images for: Lactate receptor HCAR1 regulates neurogenesis and microglia activation after neonatal hypoxia-ischemia
Source: eLife journal article supplement (doi:10.7554/elife.76451), 2022-07-01

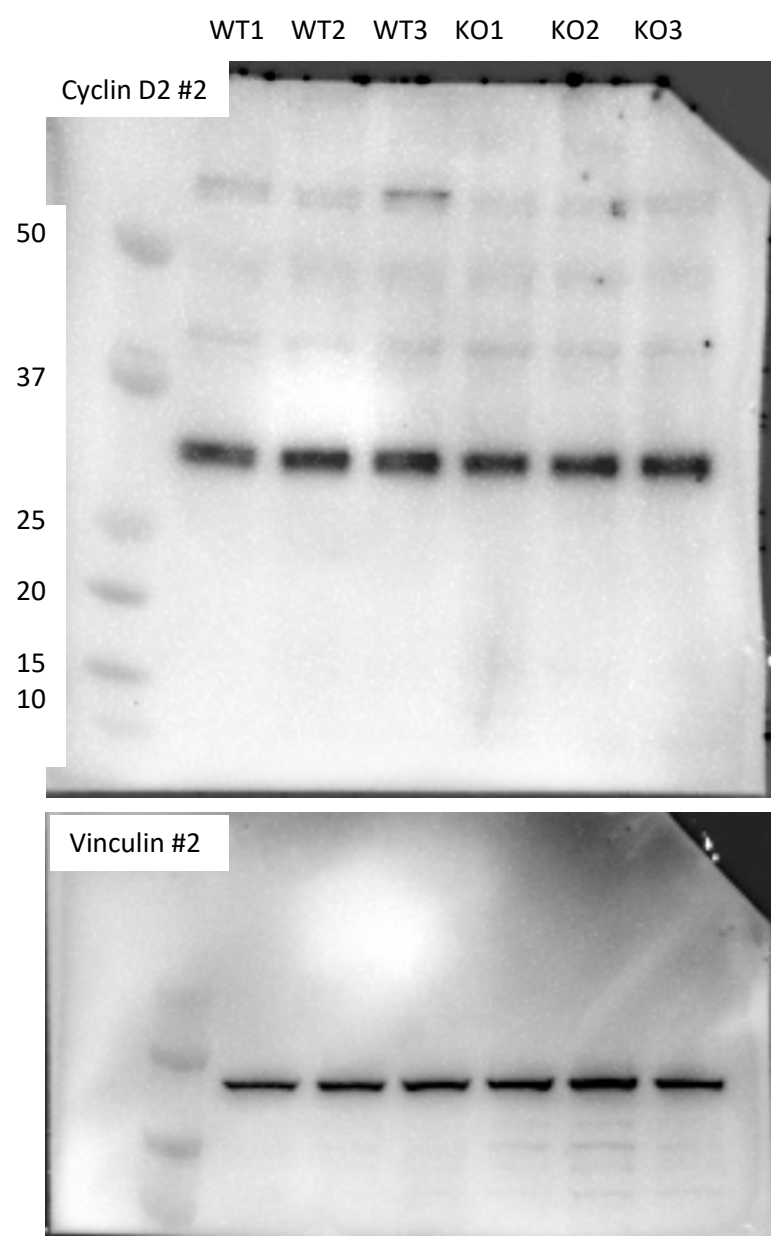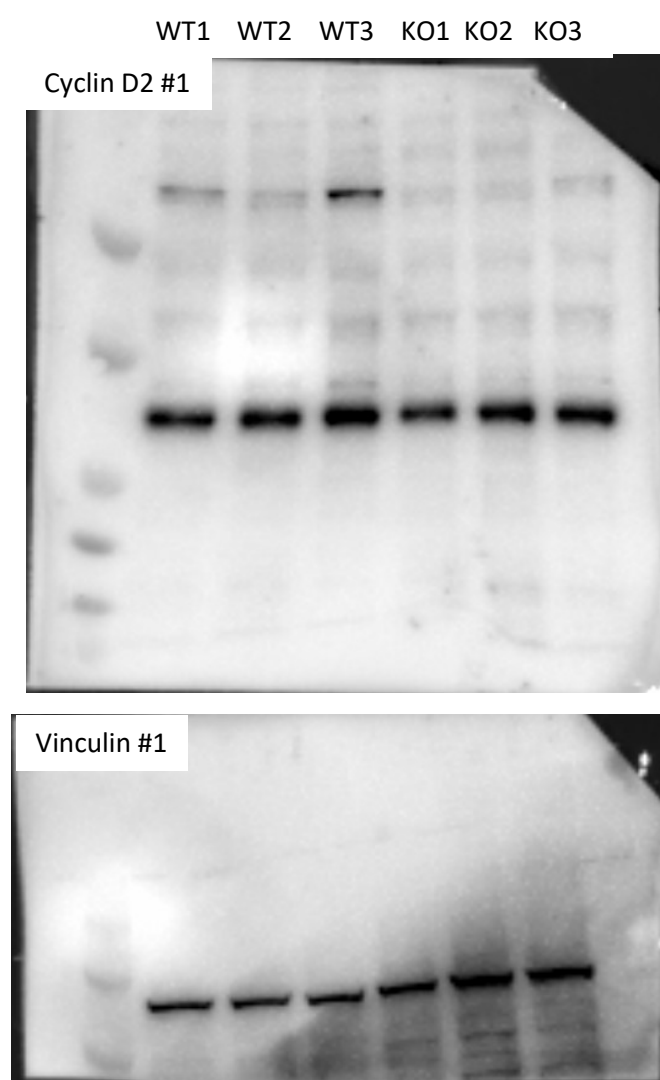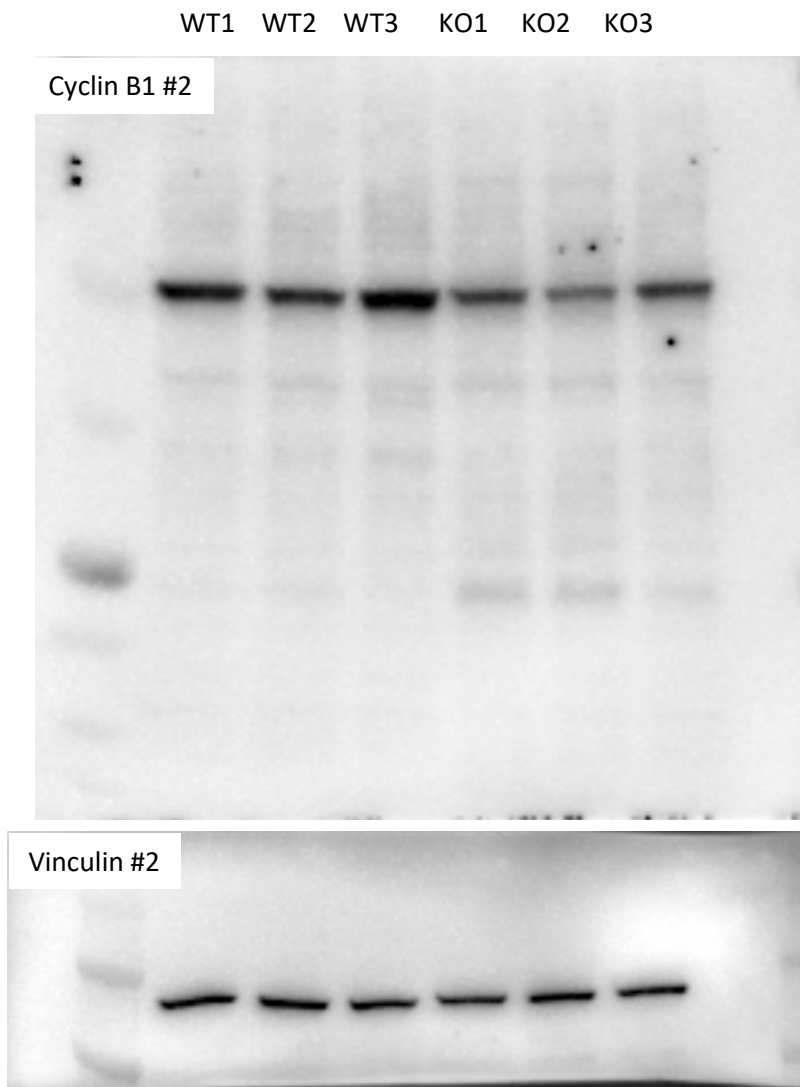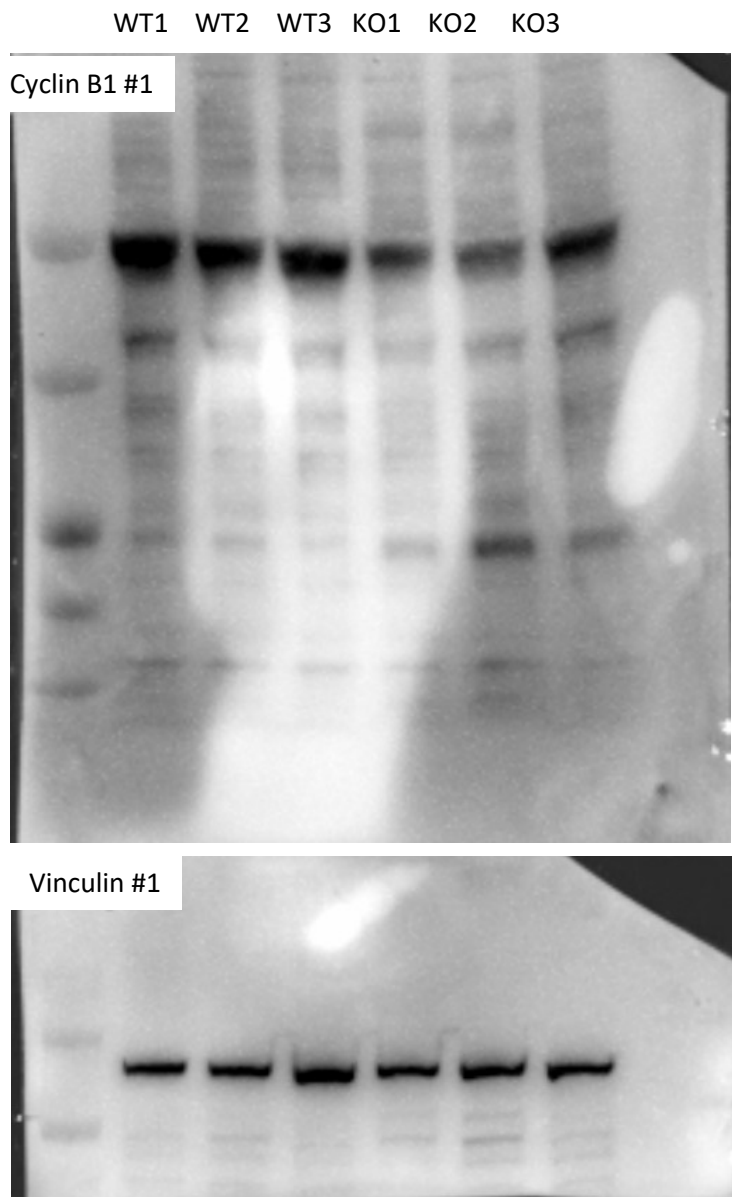

Supplement: fig5-data1 [file elife-76451-fig5-data1-v1.zip]
